# Supplementary material for: Potential Novel Thioether-Amide or Guanidine-Linker Class of SARS-CoV-2 Virus RNA-Dependent RNA Polymerase Inhibitors Identified by High-Throughput Virtual Screening Coupled to Free-Energy Calculations
Source: MDPI journal article supplement (doi:10.3390/ijms222011143), 2021-10-15
Supplement: s1 [file s1]

## Supporting Information

for

### **Potential Novel Thioether-Amide or Guanidine-Linker Class of SARS-CoV-2 Virus RNA-Dependent RNA Polymerase Inhibitors Identified by High-Throughput Virtual Screening Coupled to Free-Energy Calculations**

*Marko Jukič<sup>a, b</sup>, Dušanka Janežič<sup>b\*</sup>, and Urban Bren<sup>a, b\*</sup>*

<sup>a</sup> University of Maribor, Faculty of Chemistry and Chemical Engineering, Laboratory of Physical Chemistry and Chemical Thermodynamics, Smetanova 17, SI-2000 Maribor, Slovenia.

<sup>b</sup> University of Primorska, Faculty of Mathematics, Natural Sciences and Information Technologies, Glagoljaška 8, SI-6000 Koper, Slovenia.

Authors to whom correspondence should be addressed:

\* Urban Bren, University of Maribor, Faculty of Chemistry and Chemical Engineering, Laboratory of Physical Chemistry and Chemical Thermodynamics, Smetanova 17, SI-2000 Maribor, Slovenia; E-mail: [urban.bren@um.si](mailto:urban.bren@um.si).

\* Dušanka Janežič, University of Primorska, Faculty of Mathematics, Natural Sciences and Information Technologies, Glagoljaška 8, SI-6000 Koper, Slovenia; E-mail: [dusanka.janezic@upr.si](mailto:dusanka.janezic@upr.si).

Table S1: Extended list of hit compounds.

| no. | name    | SMILES                                    | AMW<br>(g/mol) | docking<br>score |
|-----|---------|-------------------------------------------|----------------|------------------|
| 1   | omega_9 | Cc1cc(=O)nc(NC(=[NH2+])Nc2ccc(Oc3ccccc3)c | 336.375        | -                |
|     | 5307    | c2)[nH]1                                  |                | 12.72462226      |
|     |         |                                           |                | 0000002          |
| 2   | omega_6 | Cc1cc(=O)[nH]c(NC(=[NH2+])NCCc2c[nH]c3cc  | 311.369        | -                |
|     | 1132    | ccc23)n1                                  |                | 12.68065200      |
|     |         |                                           |                | 0000002          |
| 3   | omega_9 | CCOc1ccc(NC(=[NH2+])Nc2nc(=O)c3c([nH]2)C  | 328.3960000    | -                |
|     | 5597    | CCC3)cc1                                  | 0000013        | 12.23079684      |
|     |         |                                           |                | 0000002          |
| 4   | omega_2 | Nc1n[nH]c(SCC(=O)NC(=O)c2ccc[nH]2)n1      | 266.286        | -                |
|     | 3267    |                                           |                | 11.58801522      |
| 5   | omega_2 | Cc1ccc(NC(=[NH2+])Nc2nc(=O)cc(CSc3ccc(C)c | 380.4970000    | -                |
|     | 66712   | c3)[nH]2)cc1                              | 0000007        | 11.50689556      |
| 6   | omega_7 | CC(C)Oc1ccc(CNC(=[NH2+])NC(N)=[NH2+])cc   | 285.779        | -                |
|     | 9908    | 1Cl                                       |                | 11.45967399      |
| 7   | omega_2 | Cc1ccc(NC(=[NH2+])NC2=[NH+][C@H](CC(=     | 380.4520000    | -                |
|     | 12413   | O)Nc3ccccc3C)C(=O)N2)cc1                  | 000001         | 11.41230548      |
|     |         |                                           |                | 0000002          |
| 8   | omega_6 | CCOC(=O)CCc1c(C)nc(NC(=[NH2+])Nc2ccccc2   | 344.3950000    | -                |
|     | 2575    | )[nH]c1=O                                 | 0000004        | 11.39842637      |
| 9   | omega_2 | [NH3+][C@H](CCc1nc2ccccc2[nH]1)c1nc2ccccc | 292.3660000    | -                |
|     | 00646   | 2[nH]1                                    | 0000004        | 11.39447159      |

|    |         |                                                                           |             |   |             |         |
|----|---------|---------------------------------------------------------------------------|-------------|---|-------------|---------|
| 10 | omega_1 | <chem>C[C@@H](c1nc2cccc2c(=O)[nH]1)[N@@H+](C)Cc1nc(=O)c2cccc2[nH]1</chem> | 362.413     | - | 11.34618248 | 0000001 |
| 11 | omega_6 | <chem>CCOC(=O)CCc1c(C)nc(NC(=[NH2+])Nc2ccc(C)c(C)c2)[nH]c1=O</chem>       | 372.4490000 | - | 11.33483645 | 000001  |
| 12 | omega_2 | <chem>CCCCOc1ccc(CNC(=[NH2+])NC(N)=[NH2+])cc1</chem>                      | 265.361     | - | 11.28781721 | 1       |
| 13 | omega_9 | <chem>NC(=[NH2+])NCCC[C@@H](NC(=O)c1cccc1)C(=O)[O-]</chem>                | 278.3120000 | - | 11.27801214 | 0000007 |
| 14 | omega_9 | <chem>NC(=[NH2+])NC(=[NH2+])Nc1ccc(Br)cc1</chem>                          | 258.123     | - | 11.27557536 | 0000001 |
| 15 | omega_1 | <chem>NC(=[NH2+])NC(=[NH2+])Nc1ccc(Br)cc1</chem>                          | 258.123     | - | 11.27557536 | 0000001 |
| 16 | omega_1 | <chem>Cc1cc(Br)ccc1NC(=[NH2+])NC(N)=[NH2+]</chem>                         | 272.1500000 | - | 11.25317793 | 000001  |
| 17 | omega_2 | <chem>NC(=[NH2+])NCCC[C@H](NC(=O)c1cccc1)C(N)=O</chem>                    | 278.3360000 | - | 11.23412681 | 0000007 |
| 18 | omega_2 | <chem>CCOc1ccc(NC(=[NH2+])Nc2nc(O)c3c(n2)CCC3)cc1</chem>                  | 314.3690000 | - | 11.17112752 | 000001  |

|    |         |                                                       |             |             |
|----|---------|-------------------------------------------------------|-------------|-------------|
| 19 | omega_2 | <chem>[NH2+]=C(NC1=[NH+][C@H](CC(=O)Nc2cc(Cl</chem>   | 421.2880000 | -           |
|    | 13103   | <chem>)cc(Cl)c2)C(=O)N1)Nc1cccc1</chem>               | 0000007     | 11.14261371 |
|    |         |                                                       |             | 0000003     |
| 20 | omega_2 | <chem>COc1ccc(NC(=[NH2+])Nc2nc(C)c(CC#N)c(O)n2</chem> | 313.341     | -           |
|    | 93671   | <chem>)cc1</chem>                                     |             | 11.13897136 |
|    |         |                                                       |             | 0000001     |
